# Supplementary material
Source: ML conference proceedings conference paper supplement (https://openreview.net/forum?id=o7avj3PWNC)

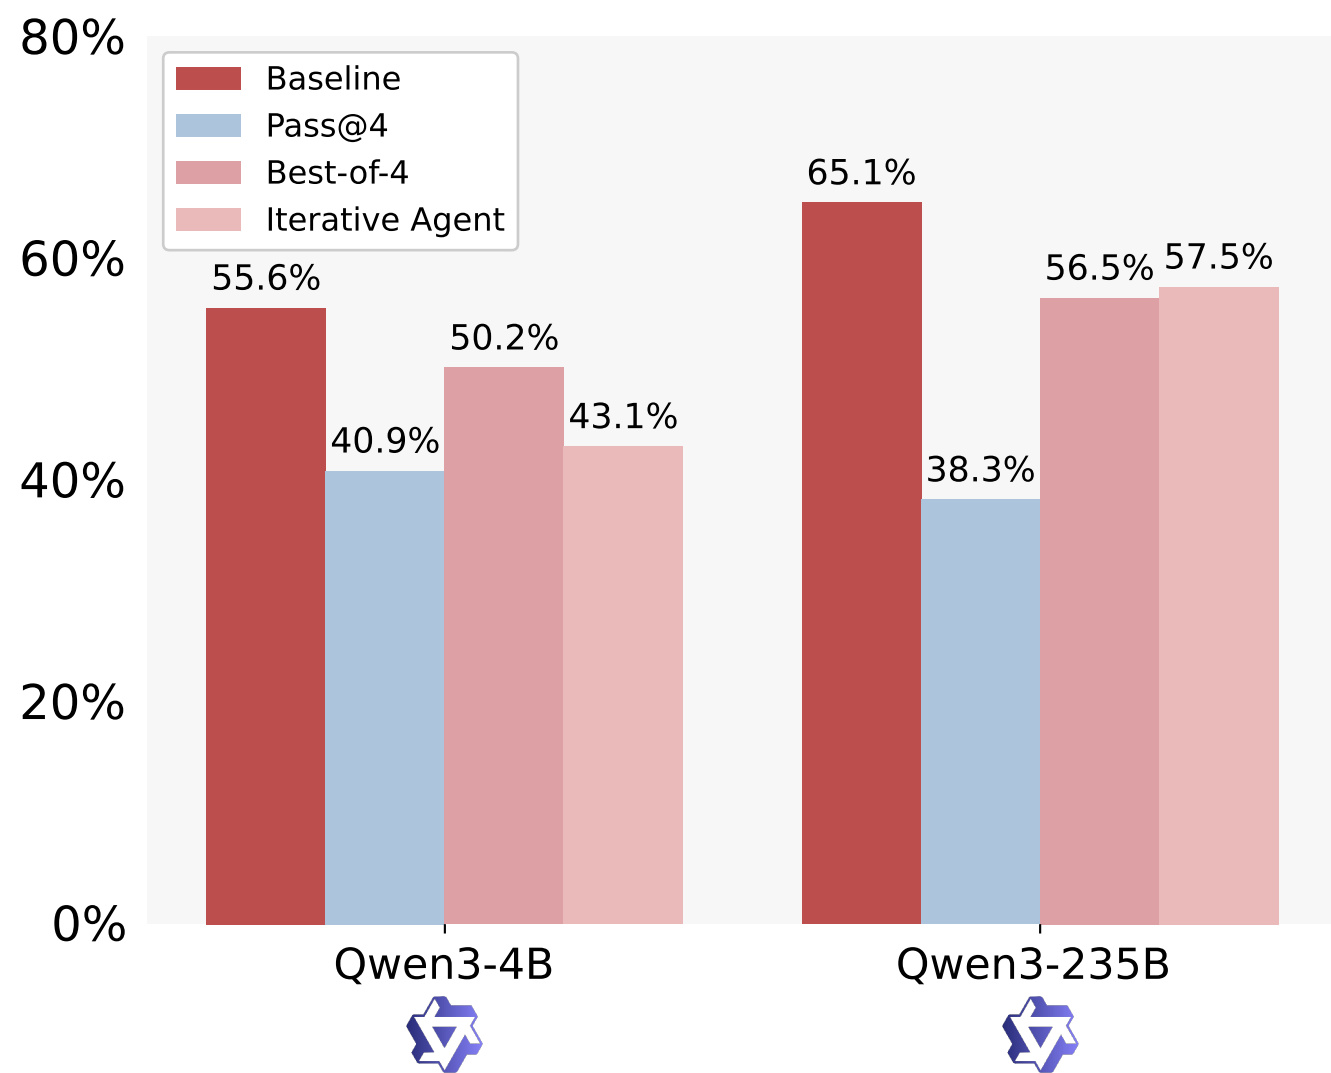

Supplement: supplementary_material [file agentic_results.pdf › supplementary/notebooks/agentic_results.pdf]

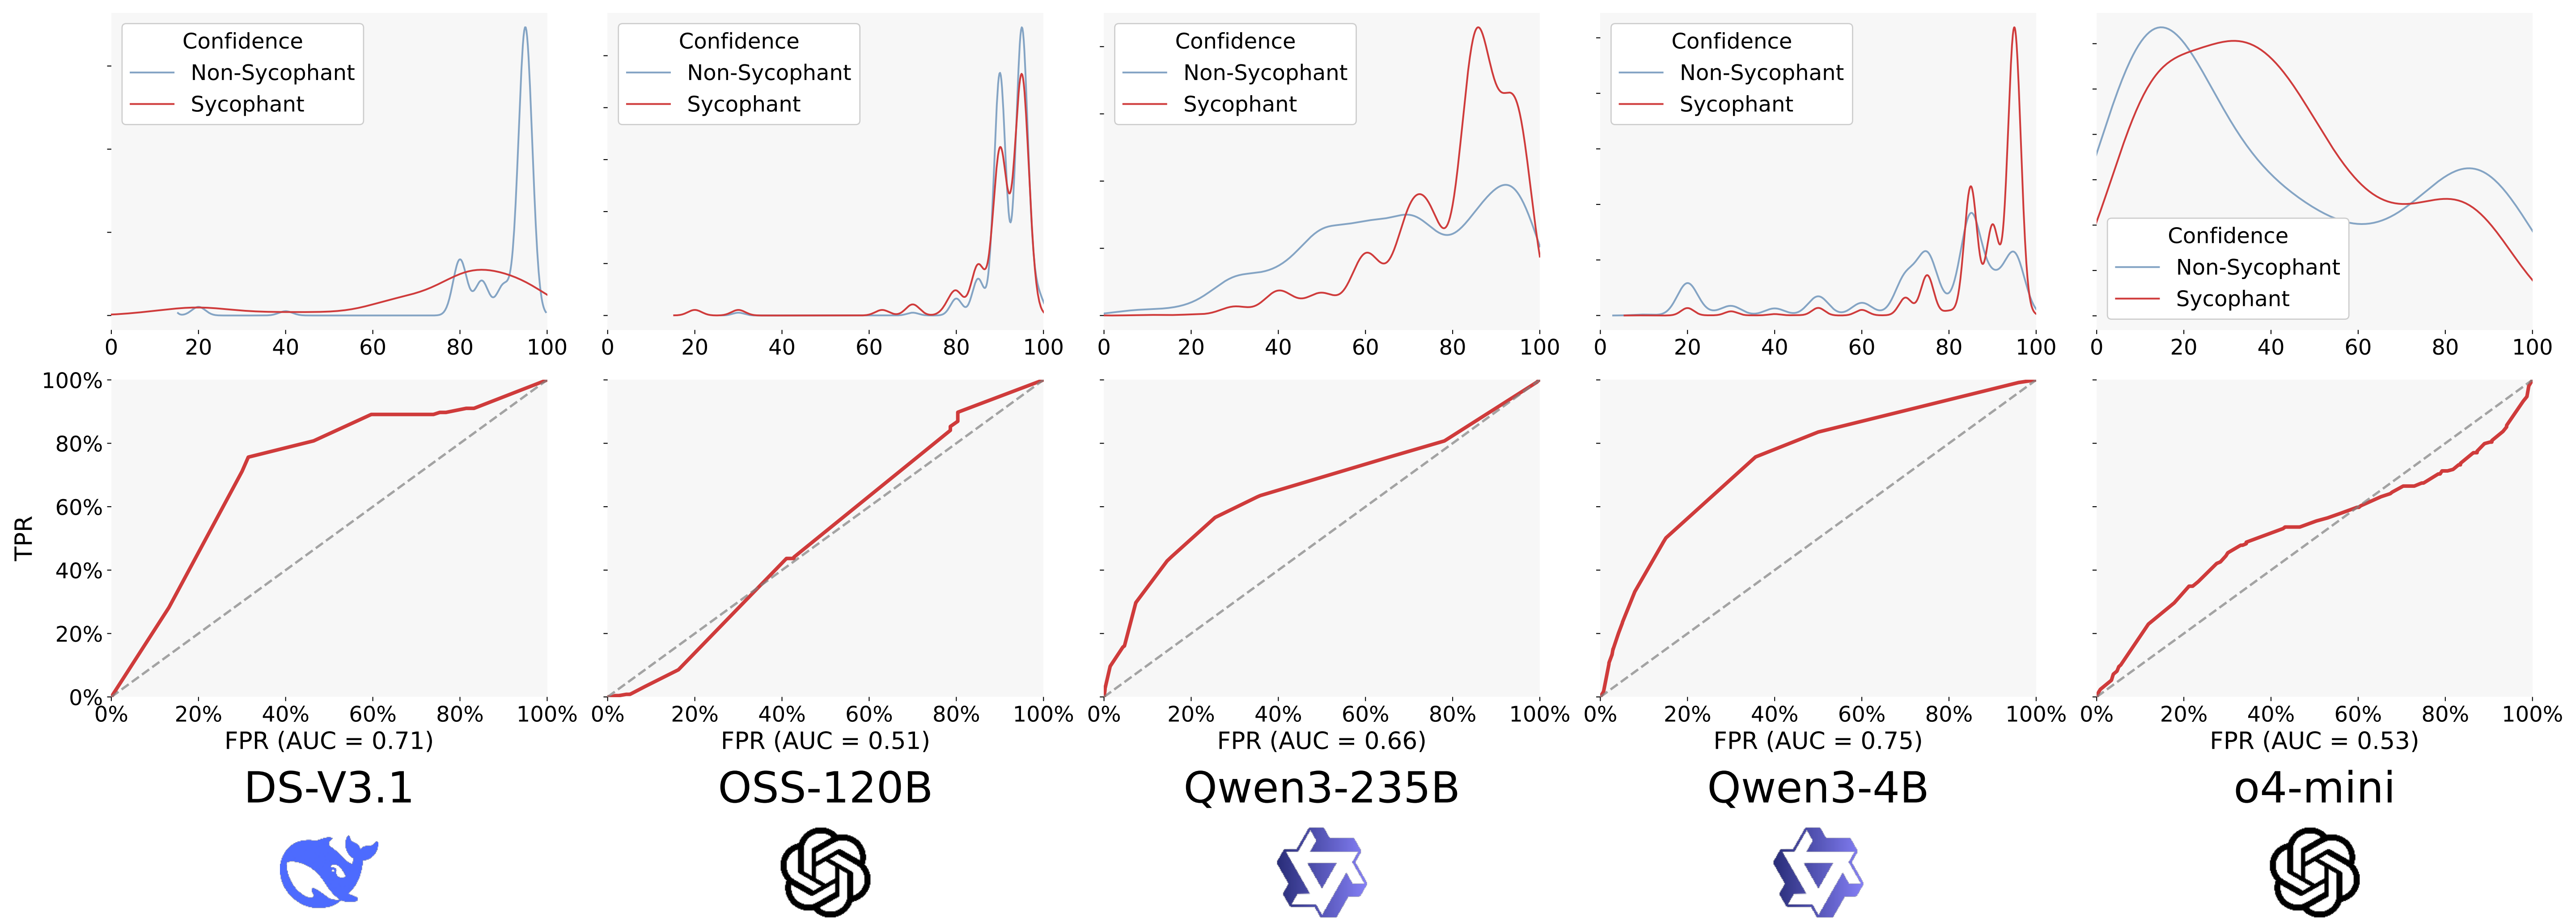

Supplement: supplementary_material [file black_box_distributions.pdf › supplementary/notebooks/black_box_distributions.pdf]

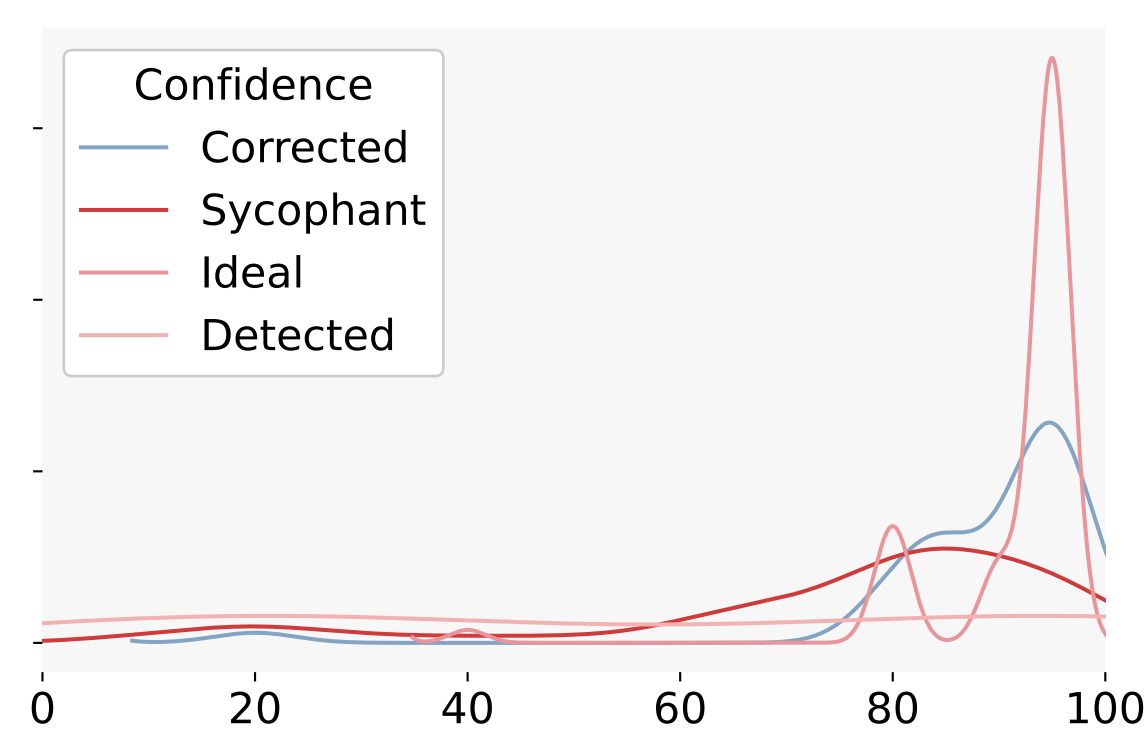

DS-V3.1

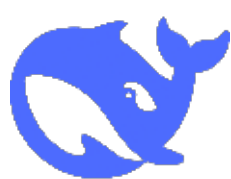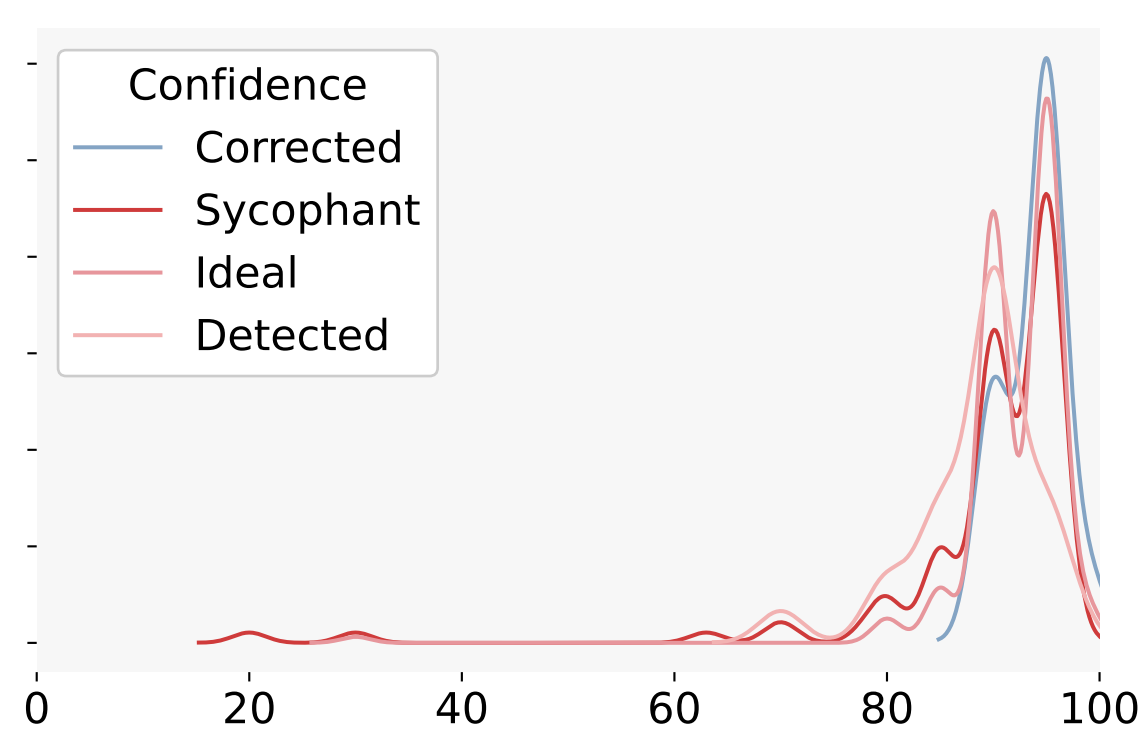

OSS-120B

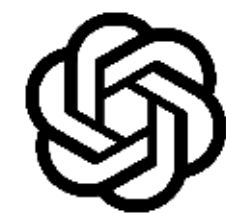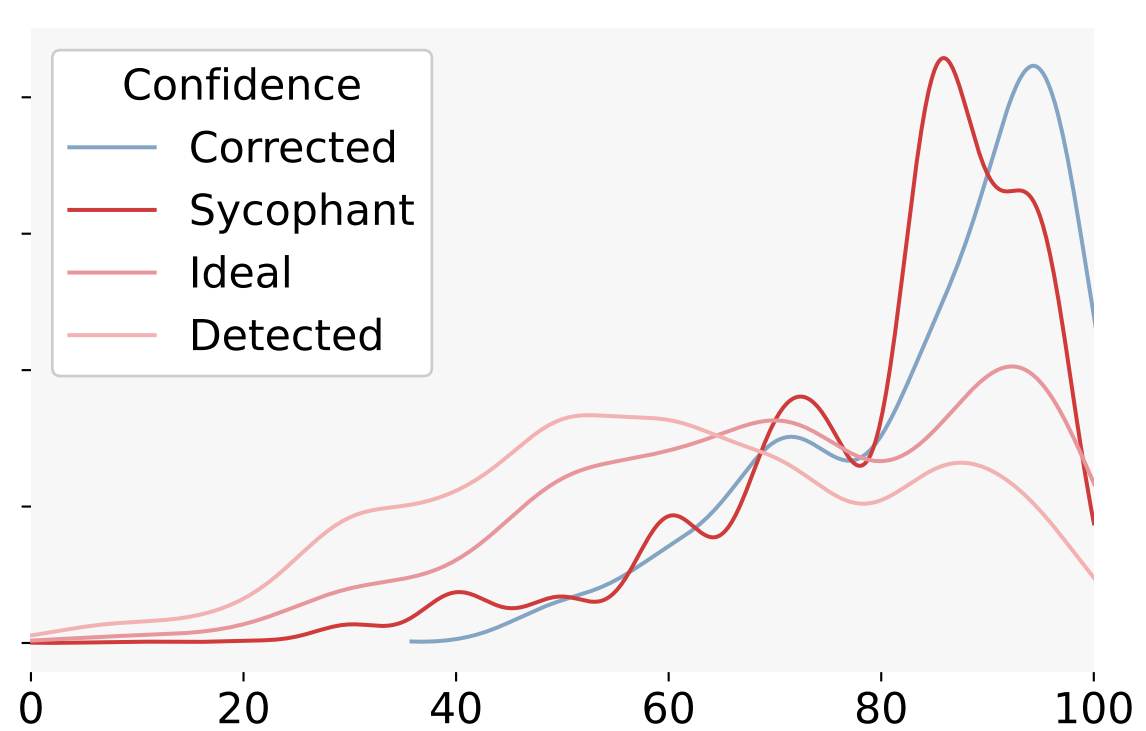

Qwen3-235B

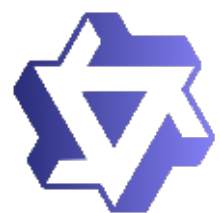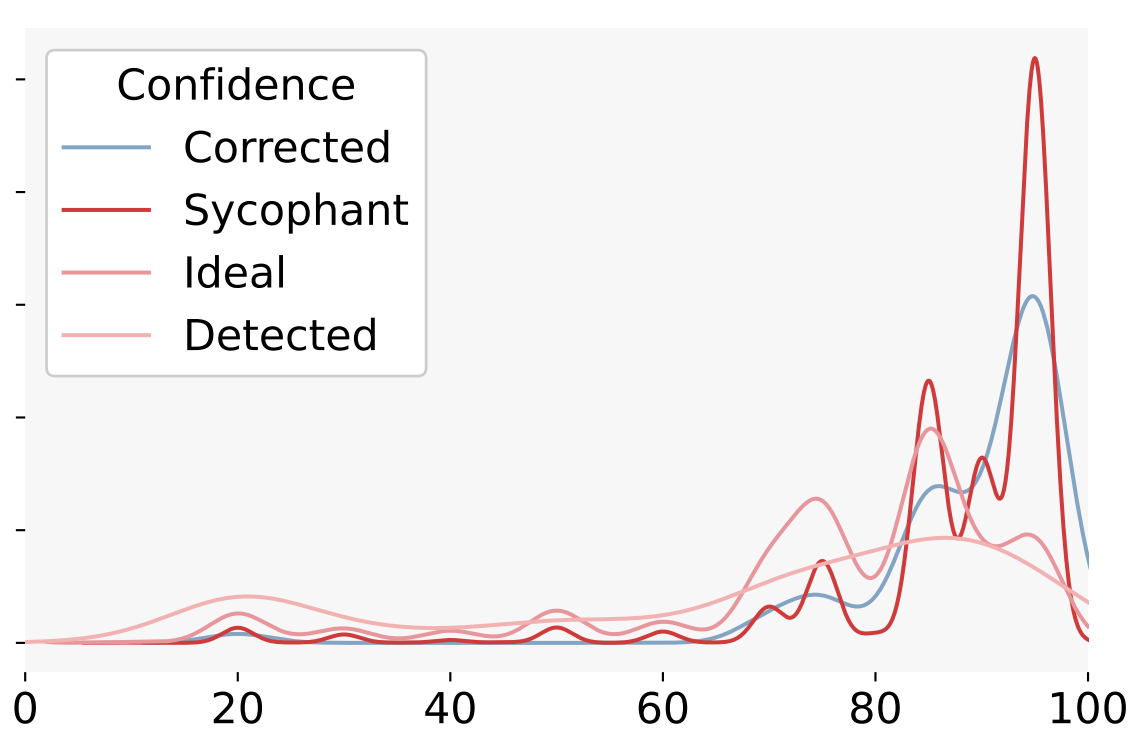

Qwen3-4B

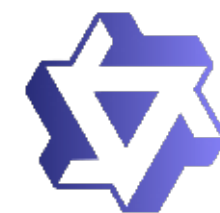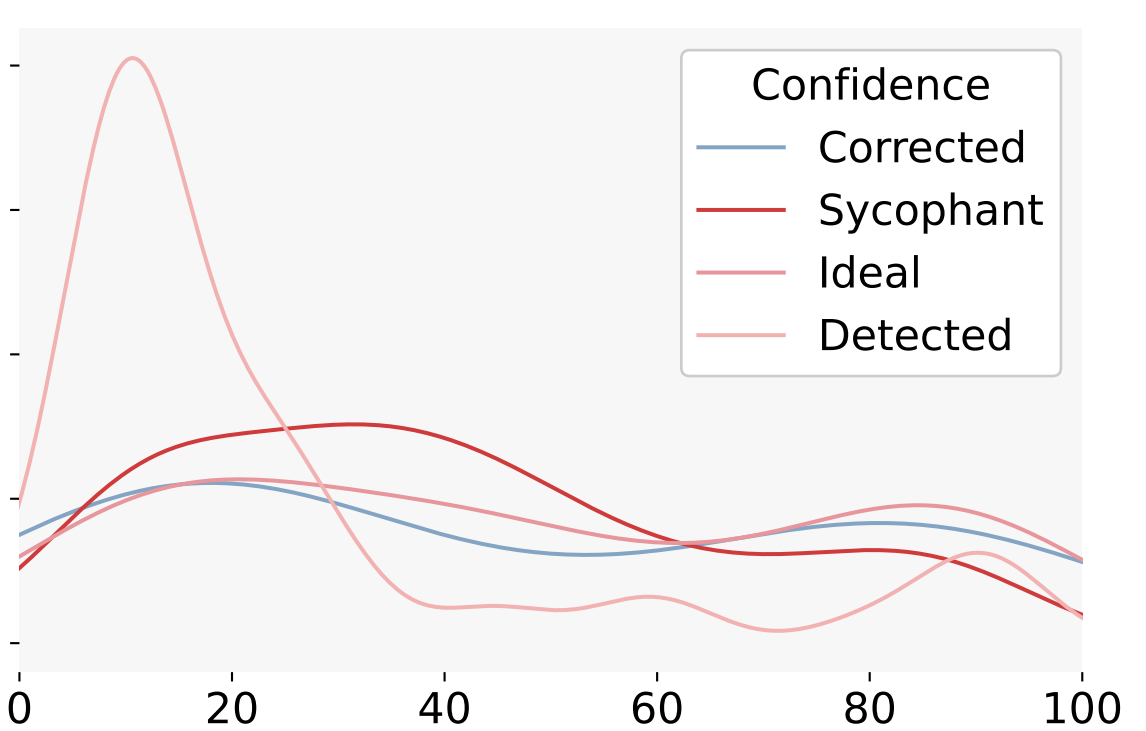

o4-mini

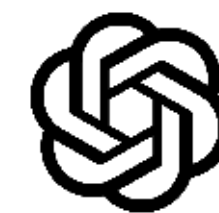

Supplement: supplementary_material [file black_box_distributions_full.pdf › supplementary/notebooks/black_box_distributions_full.pdf]

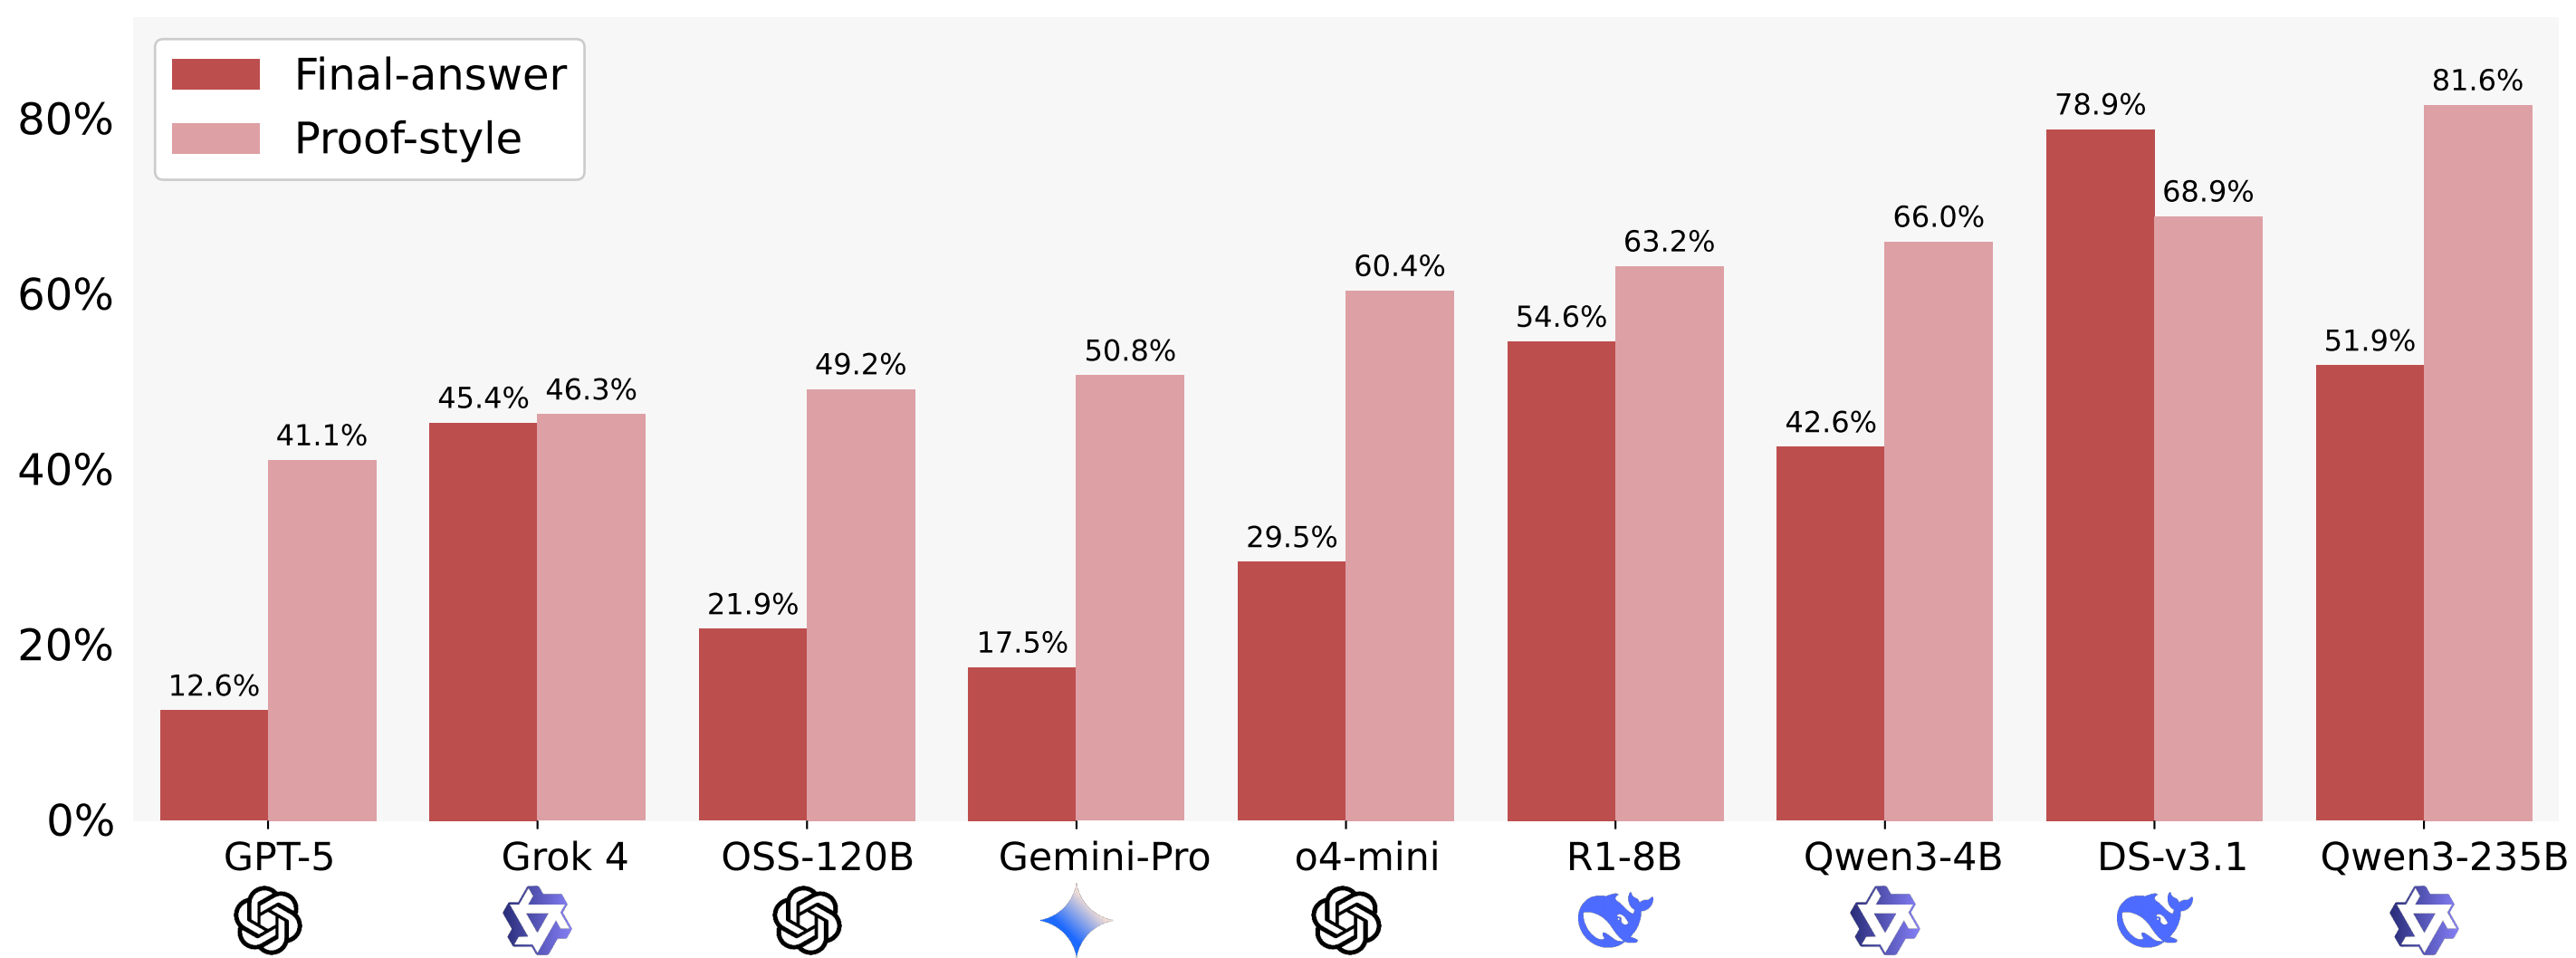

Supplement: supplementary_material [file comp_comparison.pdf › supplementary/notebooks/comp_comparison.pdf]

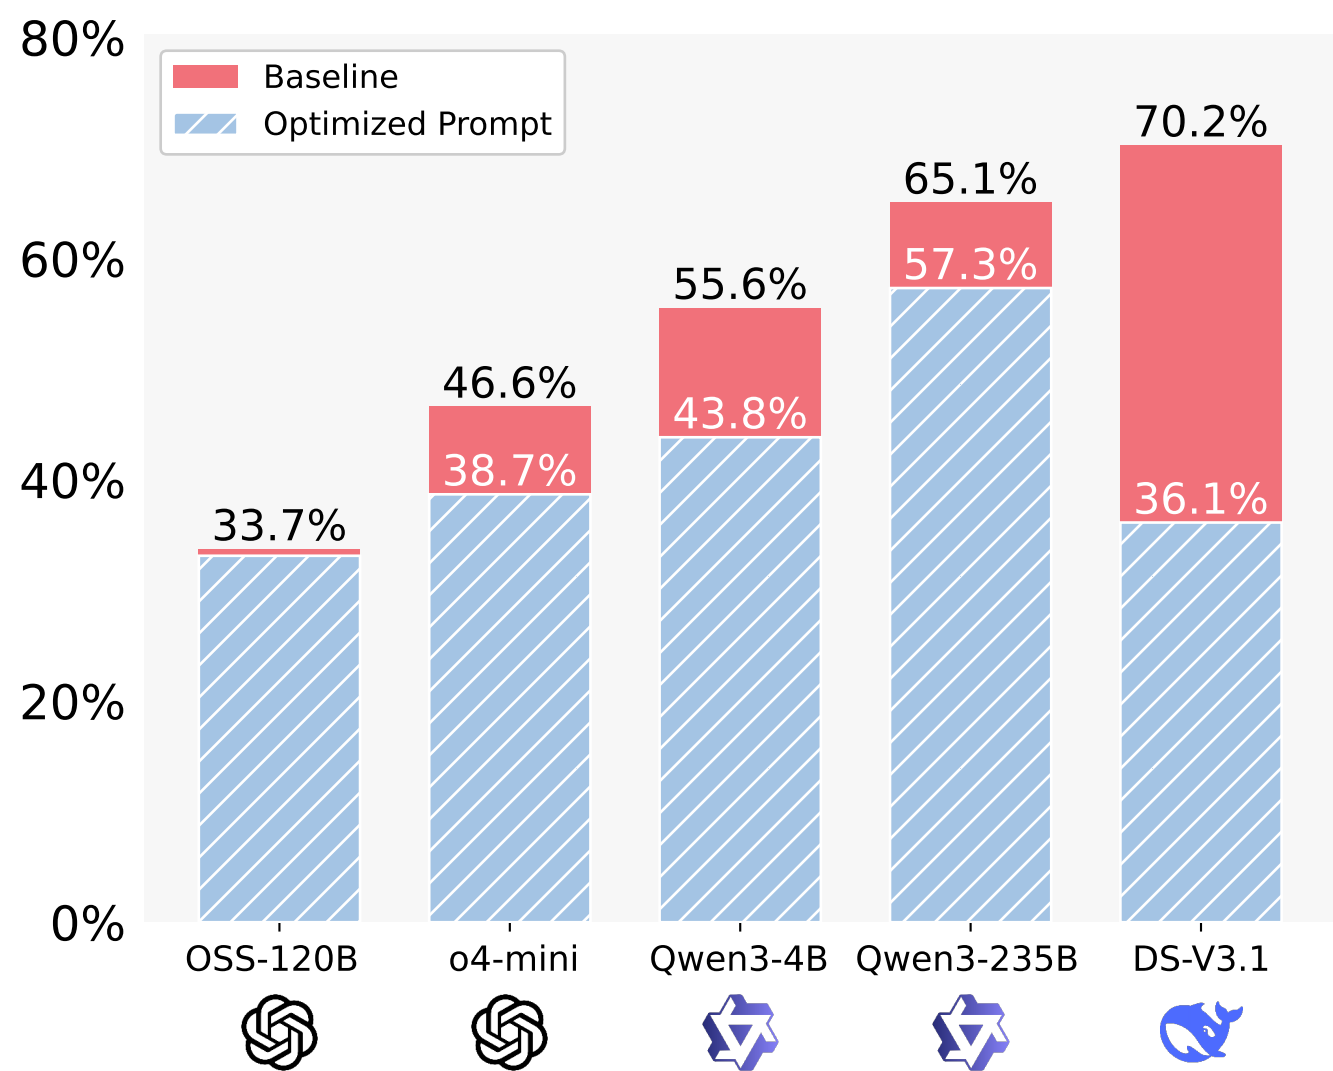

Supplement: supplementary_material [file prompt_engineering.pdf › supplementary/notebooks/prompt_engineering.pdf]

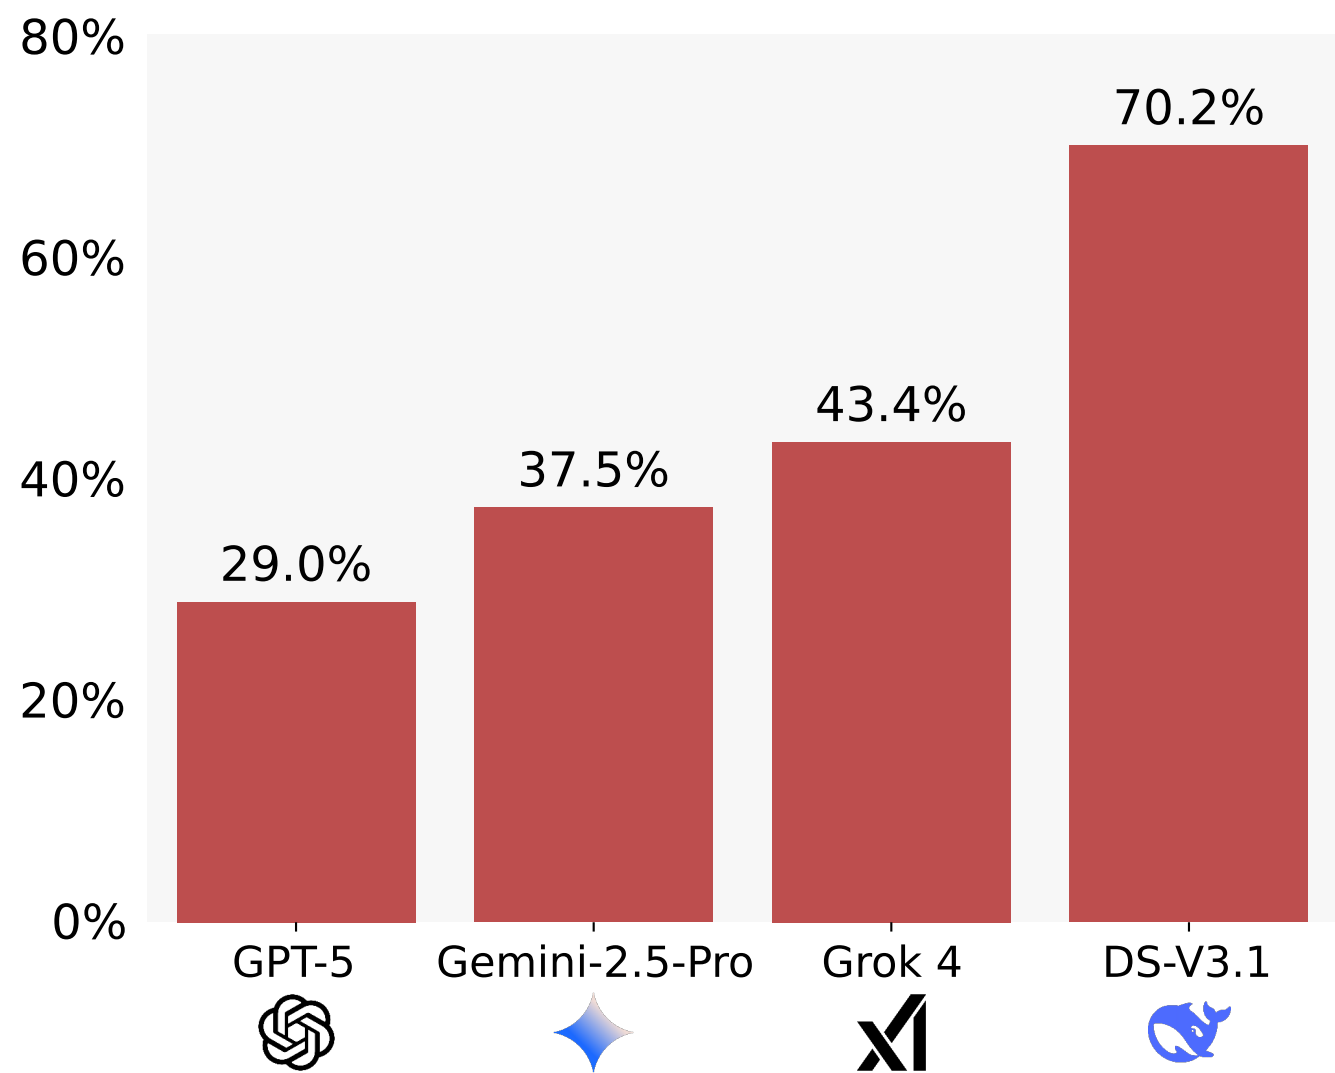

Supplement: supplementary_material [file results_overview.pdf › supplementary/notebooks/results_overview.pdf]

80%

- Baseline
- Pass@16
- Low@16
- High@16

60%

40%

20%

0%

65.1%

43.5%

58.7%

69.8%

55.6%

28.2%

59.7%

54.8%

Qwen3-235B

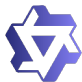

Qwen3-4B

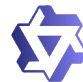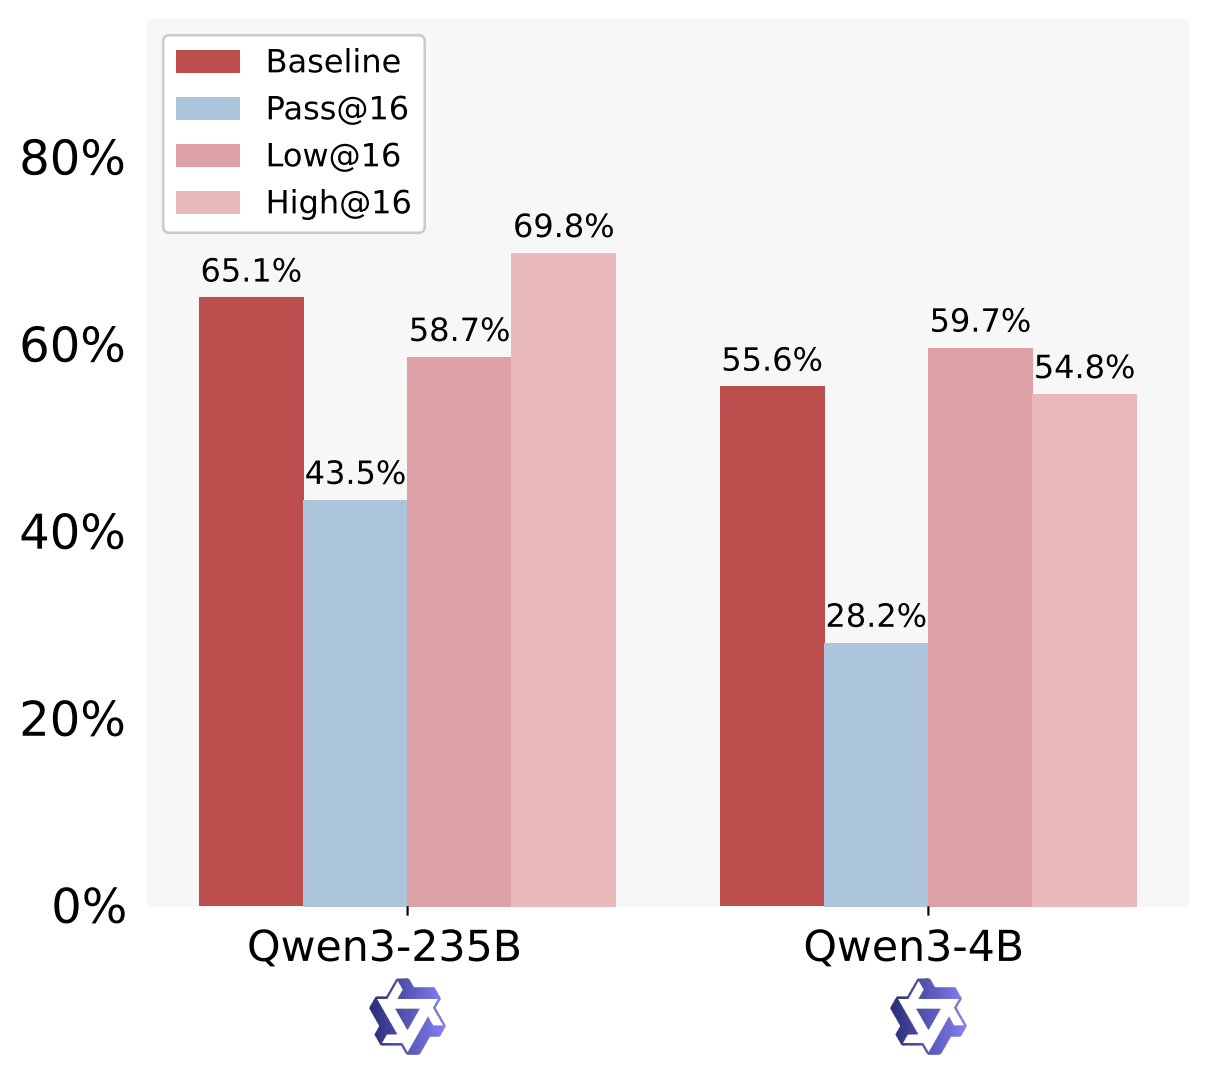

Supplement: supplementary_material [file self_confidence.pdf › supplementary/notebooks/self_confidence.pdf]

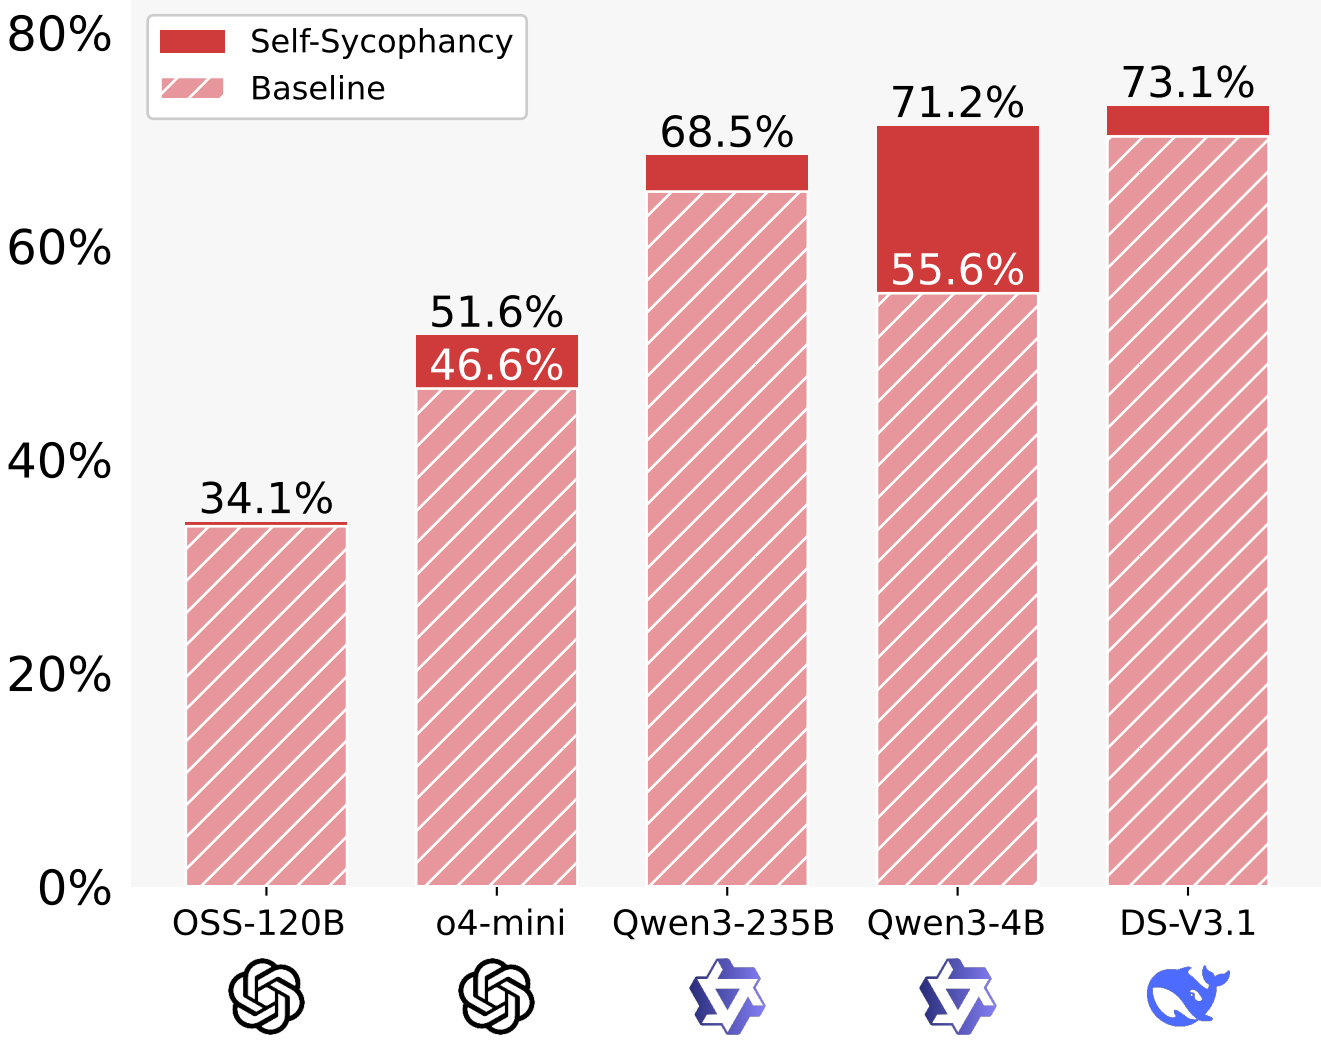

Supplement: supplementary_material [file self_sycophancy.pdf › supplementary/notebooks/self_sycophancy.pdf]

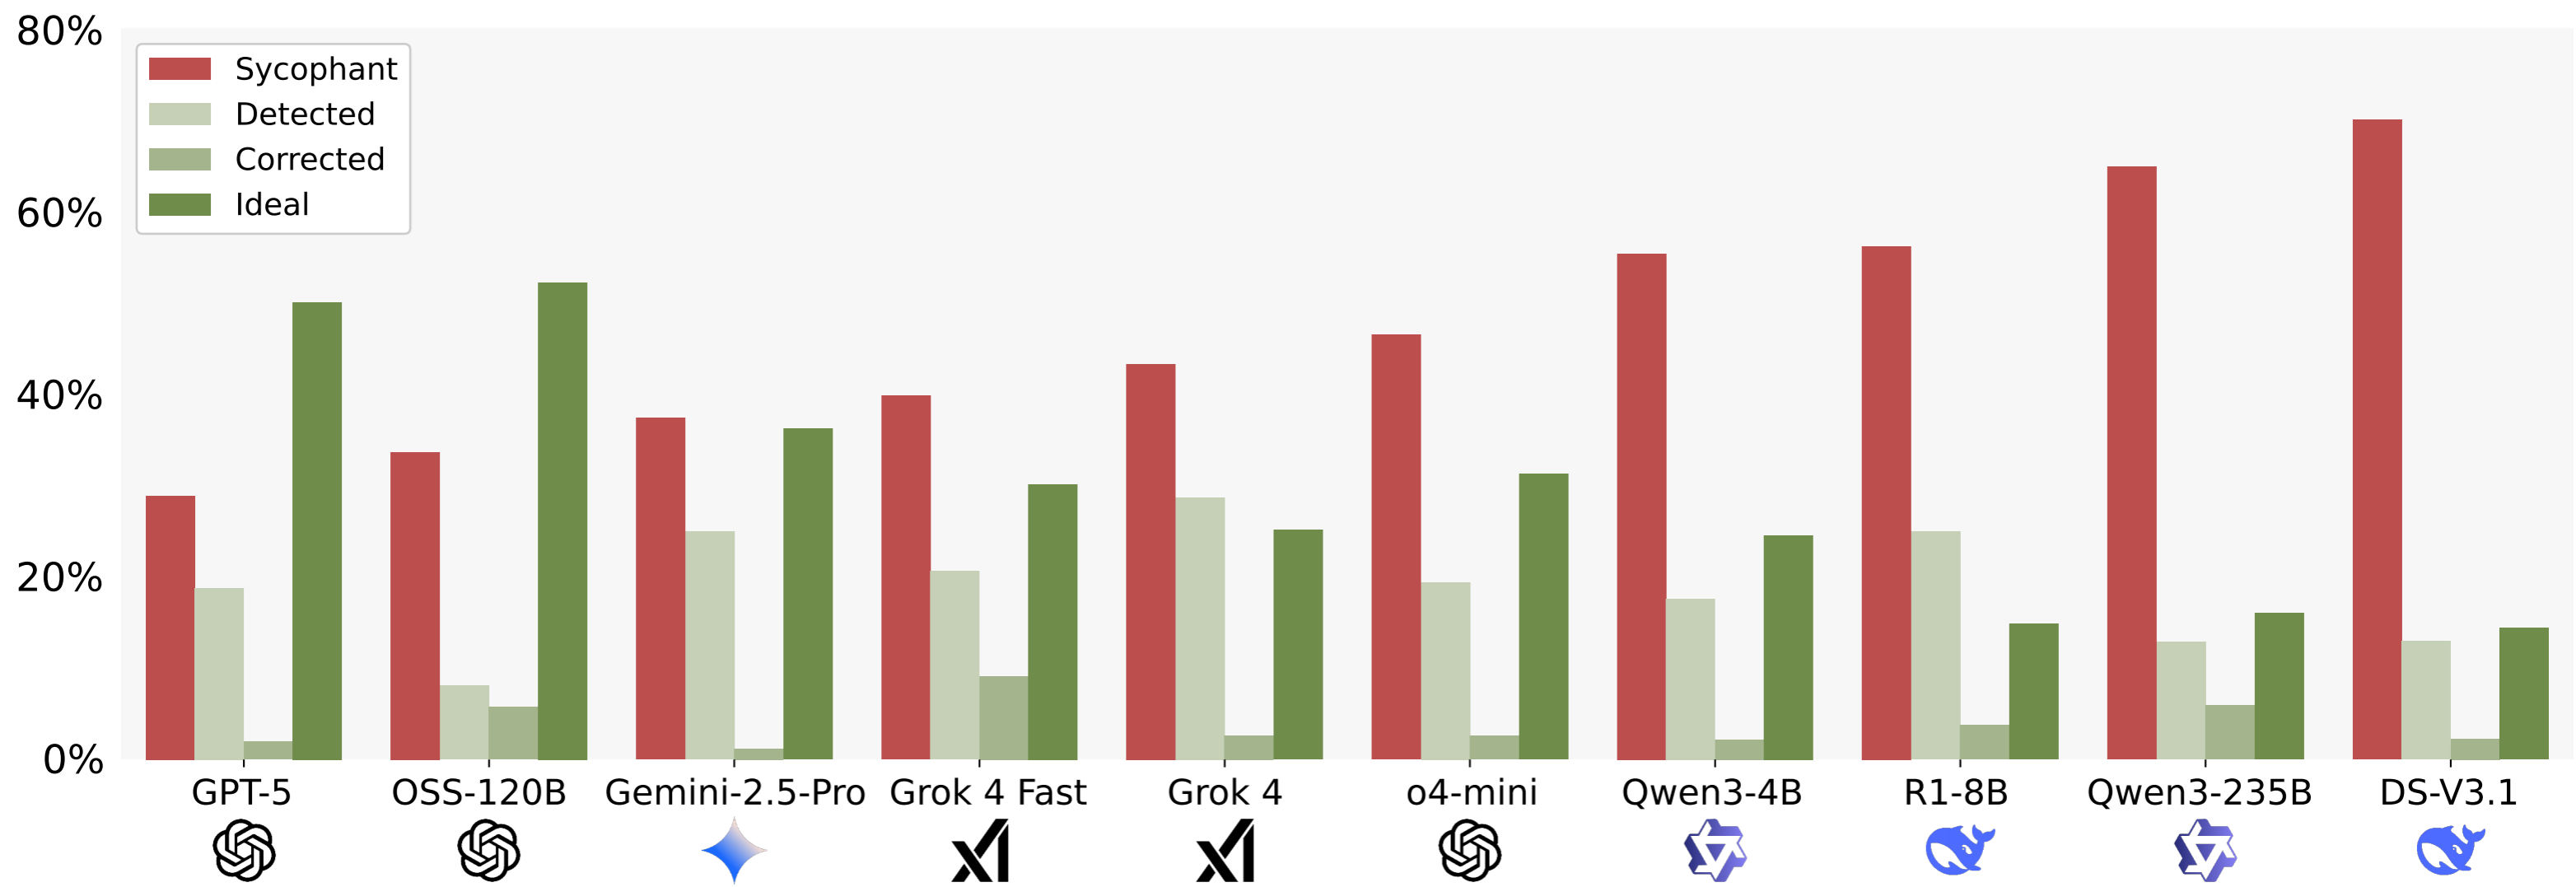

Supplement: supplementary_material [file sycophancy_categories.pdf › supplementary/notebooks/sycophancy_categories.pdf]

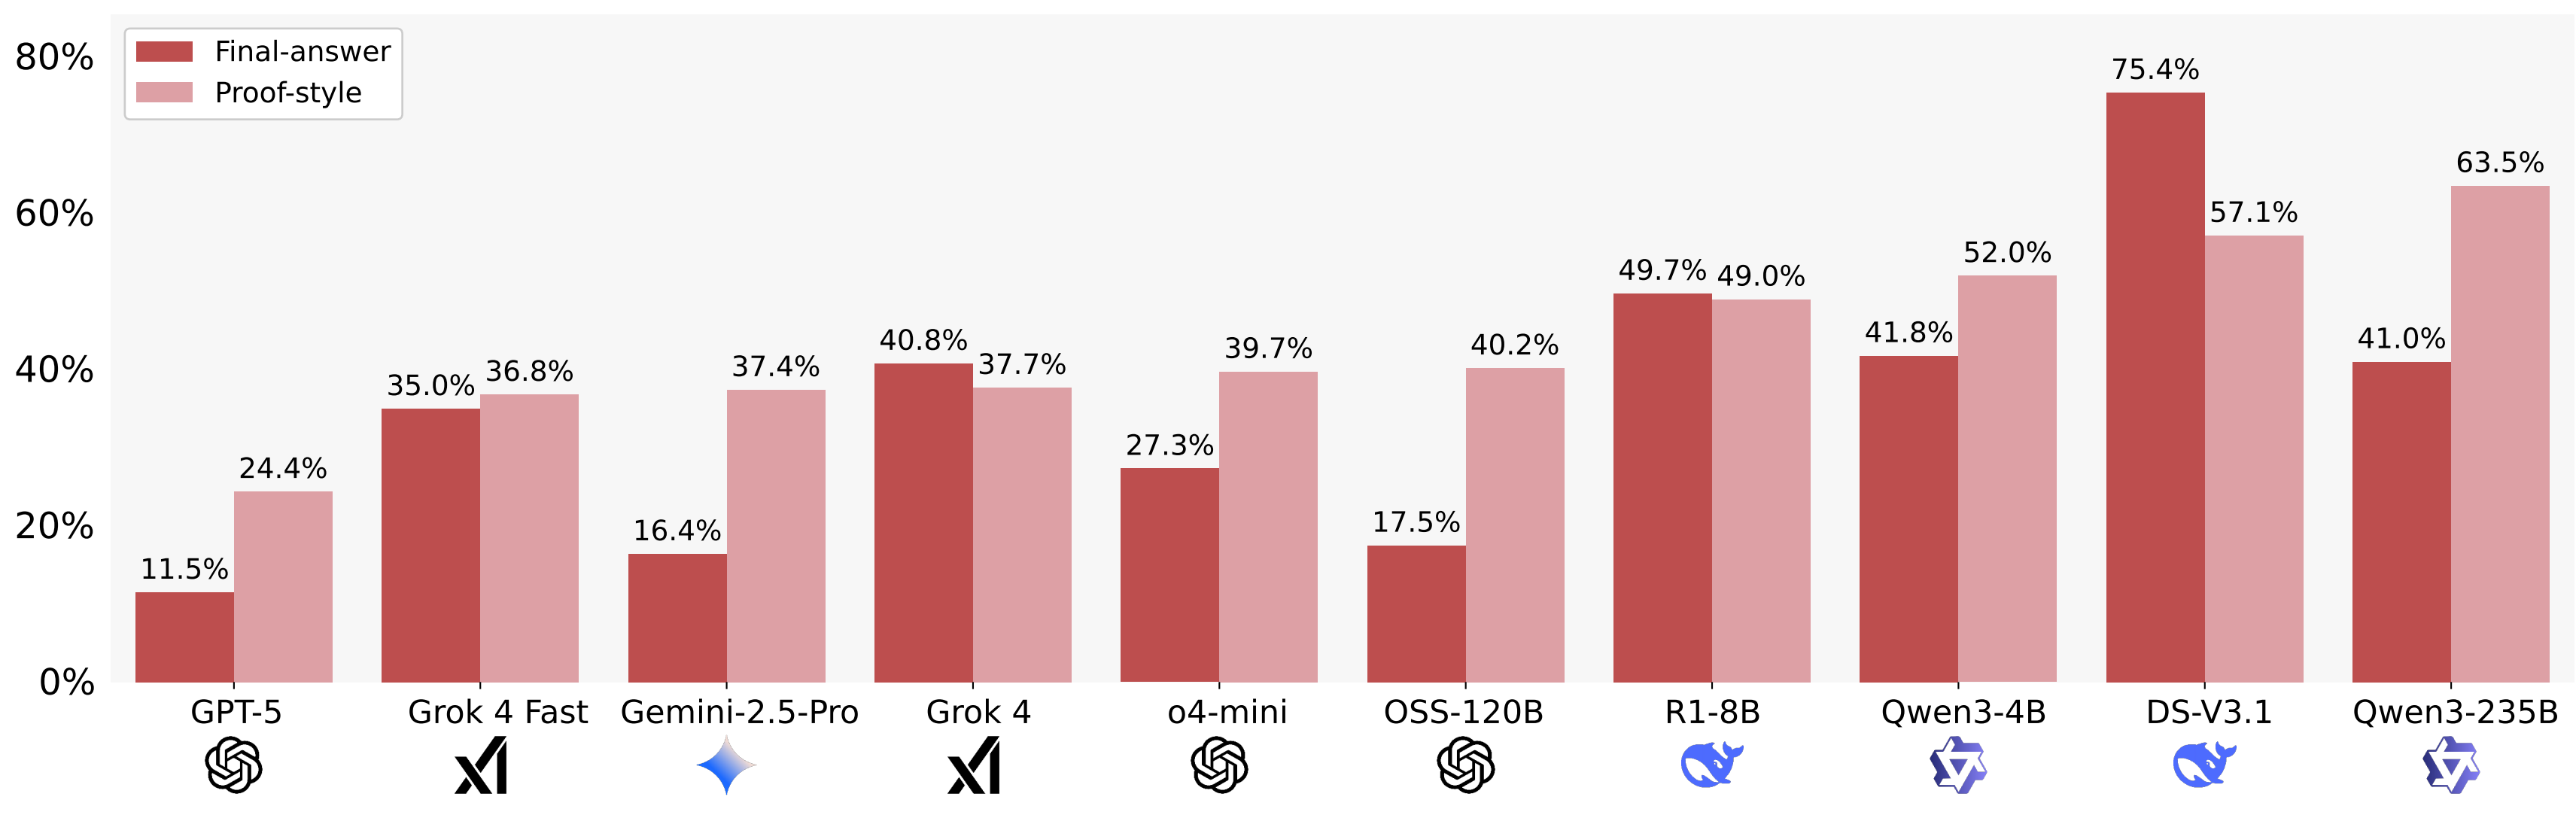

Supplement: supplementary_material [file type_comparison.pdf › supplementary/notebooks/type_comparison.pdf]

Entropy

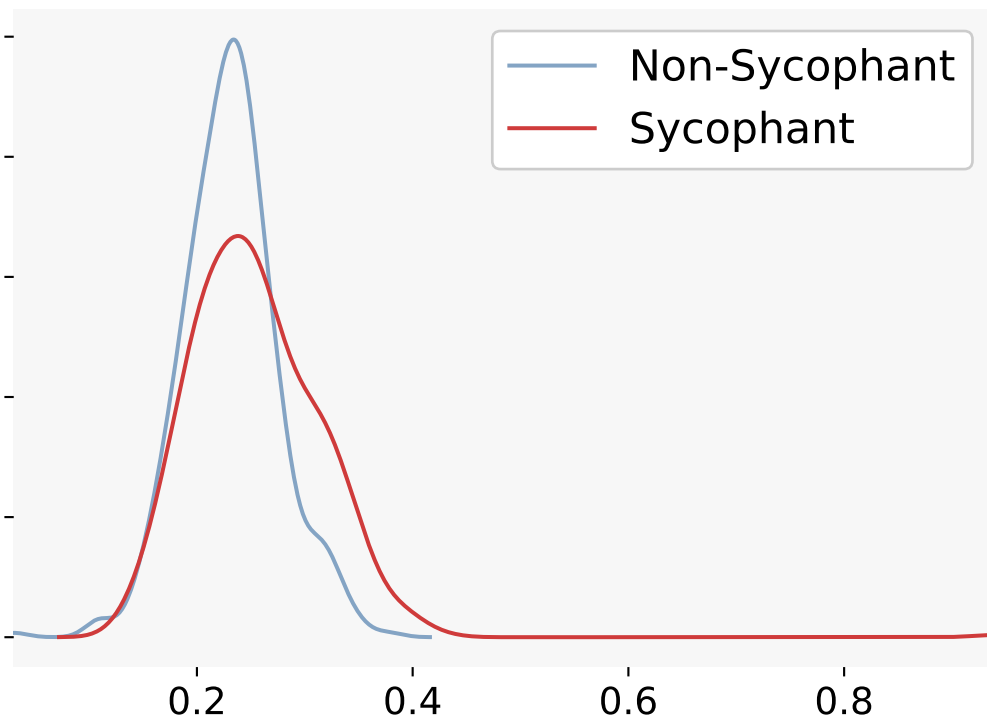

Tail@10

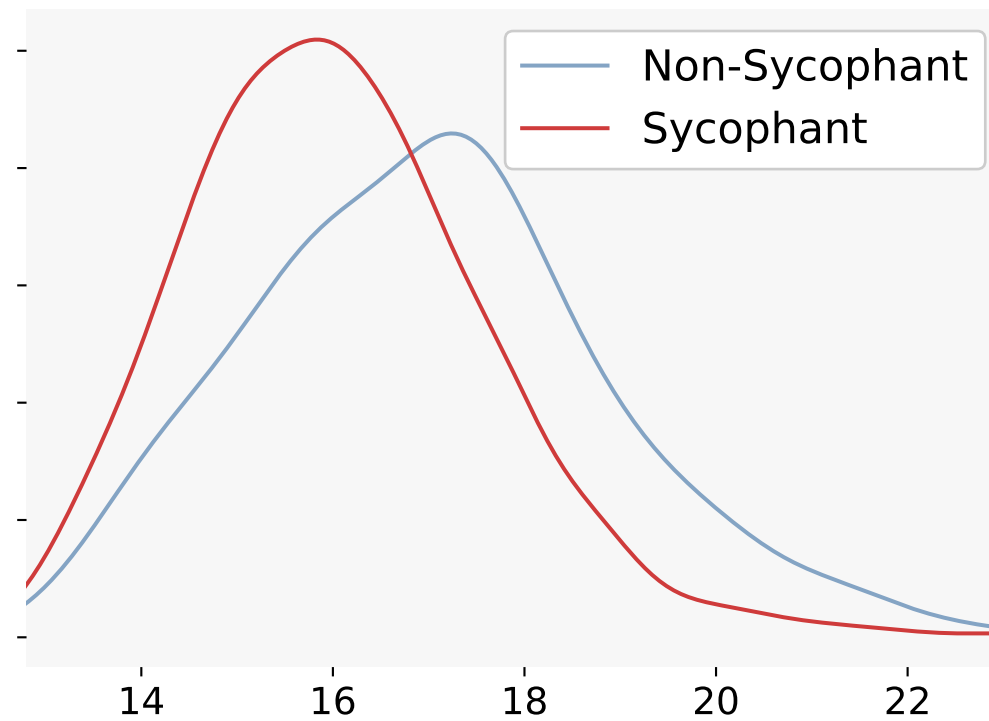

Confidence

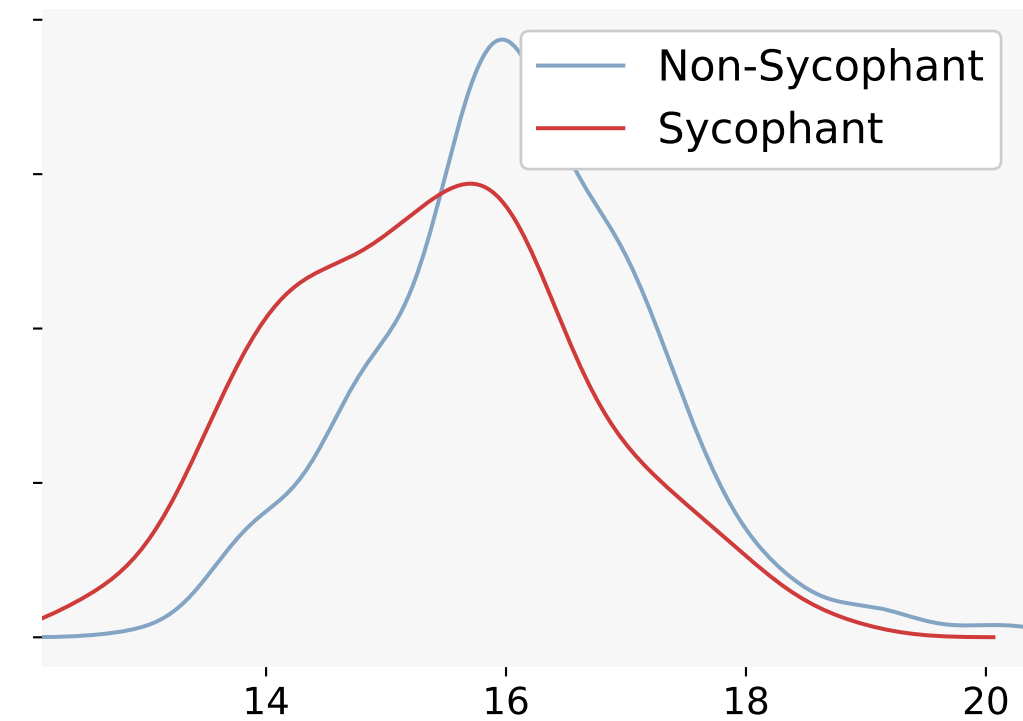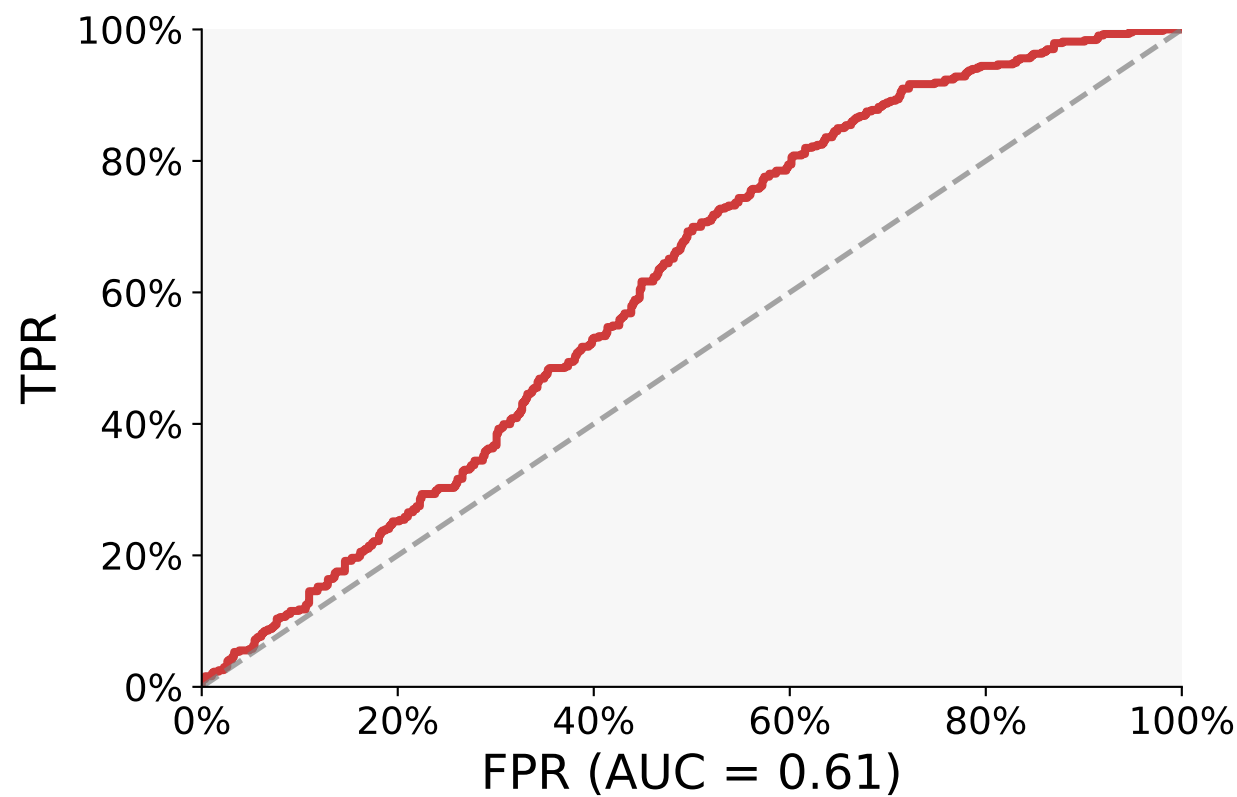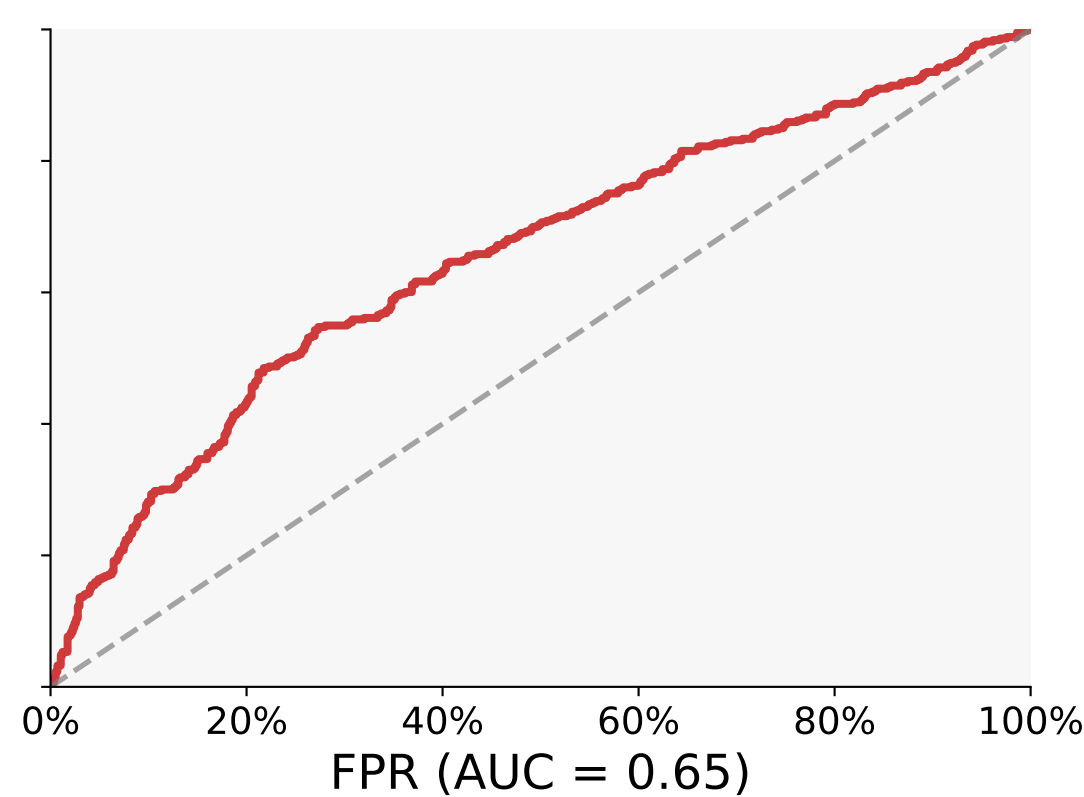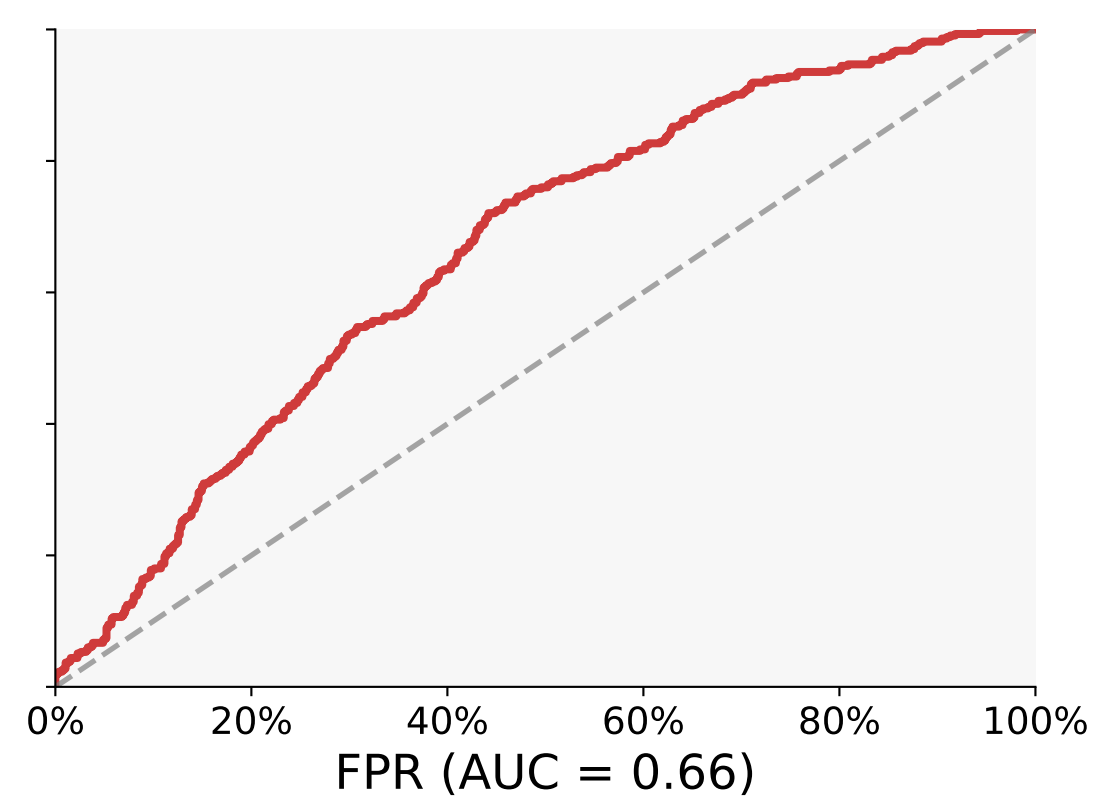

Supplement: supplementary_material [file white_box_distribution.pdf › supplementary/notebooks/white_box_distribution.pdf]
